# Supplementary material
Source: publisher figshare collection journal article supplement (https://tandf.figshare.com/ndownloader/files/23613274)
Supplement: Supplementary file 1 [file 23613274]

## SUPPLEMENT

Supplemental Table 1. Characteristics of participants in the Keokuk County Rural Health Study (KCRHS) and the Multi-Ethnic Study of Atherosclerosis (MESA) at the time of enrollment

| Characteristic                                               | KCRHS       | MESA        |
|--------------------------------------------------------------|-------------|-------------|
| <b>N</b>                                                     | 1699        | 3667        |
| <b>Age, mean (SEM)</b>                                       | 51.2 (0.41) | 61.1 (0.16) |
| <b>Sex, %</b>                                                |             |             |
| Female                                                       | 56.6        | 48.8        |
| Male                                                         | 43.4        | 51.2        |
| <b>Smoking status, %</b>                                     |             |             |
| Never smoker                                                 | 61.1        | 45.1        |
| Former smoker                                                | 23.7        | 45.2        |
| Current smoker                                               | 15.2        | 9.8         |
| <b>Cigarette pack-years for all participants, mean (SEM)</b> | 8.6 (0.41)  | 12.5 (0.37) |
| <b>Body mass index, %</b>                                    |             |             |
| <25                                                          | 25.8        | 30.2        |
| 25 to <30                                                    | 36.7        | 39.5        |
| 30 to <35                                                    | 23.7        | 20.3        |
| ≥35                                                          | 13.8        | 10.0        |
| <b>Education, %</b>                                          |             |             |
| Less than high school diploma                                | 7.8         | 15.4        |
| High school diploma                                          | 51.3        | 17.9        |
| Some college/tech school                                     | 24.5        | 28.3        |
| Bachelor's degree or higher                                  | 16.4        | 38.4        |
| <b>Occupational group, % <sup>1</sup></b>                    |             |             |
| Management/professional                                      | 32.7        | 44.3        |
| Service                                                      | 14.9        | 15.5        |
| Sales/office                                                 | 22.4        | 20.8        |
| Blue-collar                                                  | 25.8        | 19.3        |
| Other                                                        | 4.1         | 0           |
| <b>Airflow obstruction, %</b>                                | 6.5         | 5.7         |

<sup>1</sup> Groups based on Census 2000 occupational categories. Management/professional includes management; business & financial; computer & math; architecture & engineering; physical, life & social science; community & social service; legal; education; training & library; arts, design, entertainment, sports & media; healthcare practitioner & technicians. Service includes healthcare support; protective services, food prep & serving; building, grounds & maintenance; personal care & services. Sales/office includes sales and office & administrative support. Blue-collar includes farm, fishing & forestry; construction & extraction; installation, maintenance &

repair; production; transportation & material moving. Other includes military, homemaker, volunteer, and student.

Supplemental Table 2. Distribution of 1699 participants by occupational VGDF exposure, and frequency of airflow obstruction by exposure status

| <b>Occupational exposure</b> | <b>N (% of 1699)</b> | <b>Airflow obstruction n (%)</b> | <b>Cochran-Armitage test of linear trend</b> | <b>p</b> |
|------------------------------|----------------------|----------------------------------|----------------------------------------------|----------|
| <b>Total VGDF</b>            |                      |                                  |                                              |          |
| <b>No-low</b>                | 965 (56.8)           | 51 (5.3)                         |                                              |          |
| <b>Medium</b>                | 298 (17.5)           | 20 (6.7)                         |                                              |          |
| <b>High</b>                  | 436 (25.7)           | 39 (8.9)                         | 2.57                                         | 0.01     |
| <b>Vapor-gas</b>             |                      |                                  |                                              |          |
| <b>No-low</b>                | 1079 (63.5)          | 63 (5.8)                         |                                              |          |
| <b>Medium</b>                | 240 (14.1)           | 15 (6.3)                         |                                              |          |
| <b>High</b>                  | 380 (22.4)           | 32 (8.4)                         | 1.69                                         | 0.09     |
| <b>Total dust</b>            |                      |                                  |                                              |          |
| <b>No-low</b>                | 1175 (69.2)          | 69 (5.9)                         |                                              |          |
| <b>Medium</b>                | 164 (9.7)            | 9 (5.5)                          |                                              |          |
| <b>High</b>                  | 360 (21.2)           | 32 (8.9)                         | 1.89                                         | 0.06     |
| <b>Mineral dust</b>          |                      |                                  |                                              |          |
| <b>No-low</b>                | 1415 (83.3)          | 85 (6.0)                         |                                              |          |
| <b>Medium</b>                | 62 (3.7)             | 6 (9.7)                          |                                              |          |
| <b>High</b>                  | 222 (13.1)           | 19 (8.6)                         | 1.62                                         | 0.11     |
| <b>Organic dust</b>          |                      |                                  |                                              |          |
| <b>No-low</b>                | 1270 (74.7)          | 78 (6.1)                         |                                              |          |
| <b>Medium</b>                | 100 (5.9)            | 4 (4.0)                          |                                              |          |
| <b>High</b>                  | 329 (19.4)           | 28 (8.5)                         | 1.35                                         | 0.18     |
| <b>Fumes</b>                 |                      |                                  |                                              |          |
| <b>No-low</b>                | 1613 (94.9)          | 102 (6.3%)                       |                                              |          |
| <b>Medium</b>                | 46 (2.7)             | 3 (6.5%)                         |                                              |          |
| <b>High</b>                  | 40 (2.4)             | 5 (12.5%)                        | 1.40                                         | 0.19     |

Supplemental Table 3. Odds ratios from regression models of airflow obstruction for cigarette smoking, high occupational VGDF exposure, and the interaction of these two covariates<sup>1</sup>

| Cigarette smoking and high VGDF exposure | OR          | Lower 95% CI | Upper 95% CI | p      |
|------------------------------------------|-------------|--------------|--------------|--------|
| <b>Total VGDF</b>                        |             |              |              |        |
| <b>Ever smoke</b>                        | <b>2.95</b> | 1.72         | 5.08         | <.0001 |
| <b>High total VGDF</b>                   | 0.82        | 0.32         | 2.12         | 0.69   |
| <b>Ever smoke x High total VGDF</b>      | 2.2         | 0.80         | 6.00         | 0.12   |
| <b>Vapor-gas</b>                         |             |              |              |        |
| <b>Ever smoke</b>                        | <b>3.3</b>  | 1.94         | 5.60         | <.0001 |
| <b>High vapor-gas</b>                    | 0.91        | 0.34         | 2.38         | 0.84   |
| <b>Ever smoke x High vapor-gas</b>       | 1.59        | 0.57         | 4.43         | 0.37   |
| <b>Total dust</b>                        |             |              |              |        |
| <b>Ever smoke</b>                        | <b>3.05</b> | 1.80         | 5.17         | <.0001 |
| <b>High total dust</b>                   | 0.76        | 0.28         | 2.12         | 0.60   |
| <b>Ever smoke x High total dust</b>      | 2.27        | 0.79         | 6.57         | 0.13   |
| <b>Mineral dust</b>                      |             |              |              |        |
| <b>Ever smoke</b>                        | <b>3.18</b> | 1.94         | 5.20         | <.0001 |
| <b>High mineral dust</b>                 | NR          | NR           | NR           | NR     |
| <b>Ever smoke x High mineral dust</b>    | 3.38        | 0.69         | 16.5         | 0.13   |
| <b>Organic dust</b>                      |             |              |              |        |
| <b>Ever smoke</b>                        | <b>3.21</b> | 1.91         | 5.40         | <.0001 |
| <b>High organic dust</b>                 | 0.78        | 0.28         | 2.20         | 0.64   |
| <b>Ever smoke x High organic dust</b>    | 1.92        | 0.65         | 5.61         | 0.24   |

NR = OR and confidence intervals not reported because <3 participants with airflow obstruction; **Bolded OR** indicates  $p \leq 0.05$

<sup>1</sup> A separate regression model of airflow obstruction was fit for each VGDF exposure. Each model included covariates for age, sex, logarithm of BMI, highest level of education, ever asthma, farm work status, and the smoking and VGDF exposures indicated in the table.
